# Supplementary material
Source: PubMed Central journal article supplement (PMC11127744)
Supplement: NIHMS1988190-supplement-Supplementary_Material.pdf [file NIHMS1988190-supplement-Supplementary_Material.pdf]

Supplementary Materials for  
**Prospective study design and data analysis in U.K. Biobank**

Naomi E. Allen *et al.*

Corresponding author: Naomi E. Allen, [naomi.allen@ndph.ox.ac.uk](mailto:naomi.allen@ndph.ox.ac.uk)

*Sci. Transl. Med.* **16**, eadf4428 (2024)  
DOI: 10.1126/scitranslmed.adf4428

**This PDF file includes:**

Table S1

**Table S1. UK Biobank’s design approach and potential analytical approaches to reduce error in exposure-disease associations**

| <b>Design characteristic</b>                                                                     | <b>Rationale and error to be addressed</b>                                                                                                                                                                                                                                          | <b>UK Biobank’s design approach</b>                                                                                                                                                                         | <b>Potential analytical approaches</b>                                                                                                                                                                                    |
|--------------------------------------------------------------------------------------------------|-------------------------------------------------------------------------------------------------------------------------------------------------------------------------------------------------------------------------------------------------------------------------------------|-------------------------------------------------------------------------------------------------------------------------------------------------------------------------------------------------------------|---------------------------------------------------------------------------------------------------------------------------------------------------------------------------------------------------------------------------|
| <b>Large-scale prospective design</b>                                                            | Exposure data collected prior to disease (i.e. to reduce recall bias and reverse causation bias)<br><br>Large numbers of participants are needed to provide sufficient statistical power for reliable assessment of risk factors with health outcomes (i.e. to reduce random error) | Exposures measured at recruitment and participants’ health followed up over time via linkage to longitudinal healthcare records<br><br>Recruitment of 500,000 participants                                  | Perform longitudinal analyses to determine exposure-disease associations<br><br>Pool data and /or results with other studies to increase sample size                                                                      |
| <b>Participation rate and comparing cohort characteristics with that of the wider population</b> | Comparison of results from UK Biobank with studies in other populations needed to determine generalizability of research findings<br><br>The study population should be sufficiently heterogeneous to include a wide range of risk factors under investigation to enable            | Postal invites sent to all 9.2M individuals age 40-69 years and living within travelling distance of an assessment centre<br><br>Recruited participants with widely varying risk factor levels <sup>1</sup> | Control for factors associated with study participation and retention<br><br>Use Directed Acyclic Graphs (DAGs) to investigate the underlying assumptions and to identify potential sources of bias of the association(s) |

---

generalizable assessments of exposure-disease

associations

High participant engagement needed to obtain

high response rates for continued data collection

activities (i.e. to reduce systematic error due to responder bias)

Perform sensitivity analyses to assess impact of missing data resulting from non-random participation

Compare results with studies from different populations, including meta-analytical approaches that assess the impact of UK Biobank data on the overall findings

---

**Reliable assessment of a wide range of exposures:**

**Depth and breadth of exposure measurement** Comprehensive characterisation of participants' behavioural, environment and germline genome are needed to identify independent risk factors for disease (i.e. to reduce confounding)

Comprehensive (i.e. cohort-wide) assessment of exposures (incl. genomics and other biomarkers) to reduce missing values of variables

Use of DAGs to clarify the presence and direction of potential confounders and mediators

Data on exposures need to be complete and accurate to improve precision (i.e. reduce random and systematic error).

Standardised data collection protocol used to ensure data were collected accurately and in a consistent manner

Adjust for multiple relevant factors

Use of genetic causal inference models

---

Sample assays performed in the full cohort at the same time facilitate quality control

Use different analytical approaches to triangulate evidence

Supplemented crude measures with detailed objective assessments (e.g. accelerometer to assess physical activity)

Use of simulations (e.g. probabilistic bias analysis) to assess likely impact of measurement error of the exposure and confounder(s) on the risk estimate

Calibrate variables for the full cohort based on more precise measures performed in a subset

---

**Repeated exposure measures**

Repeated exposure measures are needed to enable accurate assessment of long-term average exposure (i.e. to reduce regression dilution bias).

Repeat assessments performed in subsets of the cohorts

Correct for regression dilution bias using repeated measures

---

**Reliable assessment of a wide range of health outcomes:**

**Comprehensive ascertainment of health outcomes**

Passive cohort-wide collection of health outcomes is needed to minimise ascertainment

Cohort-wide linkage to routine administrative health records

Control for factors associated with differential ascertainment of health

bias and reduce loss-to-follow-up (or attrition) bias.

outcomes that are based on participant characteristics

|                                       |                                                                                                                                                                                                                        |                                                                                                  |                                                                                                                                                                                |
|---------------------------------------|------------------------------------------------------------------------------------------------------------------------------------------------------------------------------------------------------------------------|--------------------------------------------------------------------------------------------------|--------------------------------------------------------------------------------------------------------------------------------------------------------------------------------|
| <b>Specificity of health outcomes</b> | Accurate ascertainment of outcomes (and their subtypes) needed to increase their specificity and positive predictive value (i.e. reduce random error associated with false-positives)                                  | Detailed ascertainment using diagnostic codes and other biochemical, imaging data etc.           | Perform subgroup analyses by disease sub-type, where these data are available<br><br>Develop research agenda to implement novel approaches for accurate disease classification |
| <b>Long duration of follow-up</b>     | Long-term follow-up of participants' health needed to enable assessment of temporality of associations (i.e. reduce reverse causation bias) and to accrue large numbers of incident disease (i.e. reduce random error) | Linkage to routine administrative health records since recruitment: ~15 years complete follow-up | Consider impact of exclusion/inclusion of prevalent disease cases on analysis<br><br>Perform sensitivity analyses that exclude initial follow-up periods                       |

<sup>1</sup> UK Biobank does not cover the full range of racial/ethnic diversity (given the study is based in the UK) or age (the study recruited individuals aged 40-69 years).
